# Supplementary material for: Organisational-level risk and health-promoting factors within the healthcare sector—a systematic search and review
Source: Frontiers journal article supplement (doi:10.3389/fmed.2024.1509023), 2025-01-17
Supplement: Data_Sheet_4.pdf [file Data_Sheet_4.pdf]

| Authors                          | Published |                                                                                                            | Journal                             | Volume | Issue | Notes                                    |
|----------------------------------|-----------|------------------------------------------------------------------------------------------------------------|-------------------------------------|--------|-------|------------------------------------------|
|                                  | Year      | Title                                                                                                      |                                     |        |       |                                          |
| Niinihuhta, M.; Terkamo-Mo       | 2022      | A comprehensive evaluation of factors affecting nurse leaders' work-related well-being                     | Leadersh. in Health Serv.           | 35     | 3     | Exclusion reason: Wrong comparator       |
| Andersen, L. P.; Hogh, A.; Bi    | 2018      | Work-related threats and violence in human service sectors: The importance of the psycho-social wo         | Work                                | 59     | 1     | Exclusion reason: Wrong comparator       |
| Lexén, A.; Kåhlin, I.; Erlands   | 2020      | Occupational health among swedish occupational therapists: A cross-sectional study                         | Int. J. Environ. Res. Public Health | 17     | 10    | Exclusion reason: Wrong outcomes         |
| Johannessen, D. A.; Nordfjær     | 2021      | Work-related satisfaction among clinicians working at inpatient treatment facilities for substance use (   | Int. J. Environ. Res. Public Health | 18     | 14    | Exclusion reason: Wrong comparator       |
| Mahmood, J. I.; Grotmol, K. ;    | 2019      | Life satisfaction in Norwegian medical doctors: A 15-year longitudinal study of work-related predicto      | BMC Health Serv. Res.               | 19     | 1     | Exclusion reason: Wrong comparator       |
| Ezzatvar, Y.; Calatayud, J.; An  | 2020      | Professional experience, work setting, work posture and workload influence the risk for musculoskel        | Int. Arch. Occup. Environ. Health   | 93     | 2     | Exclusion reason: Wrong population       |
| Bjorkman, A.; Engstrom, M.;      | 2017      | Identified obstacles and prerequisites in telenurses' work environment - a modified Delphi study           | BMC Health Serv. Res.               | 17     | 1     | Exclusion reason: Wrong outcomes         |
| Andersen, L. P.; Elklit, A.; Pil | 2021      | Work-related violence and organizational commitment among health care workers: does supervisor's           | Int. Arch. Occup. Environ. Health   | 94     | 7     | Exclusion reason: Wrong comparator       |
| Bazazan, A.; Dianat, I.; Bahra   | 2019      | Association of musculoskeletal disorders and workload with work schedule and job satisfaction amor         | Int. Emerg. Nurs.                   | 44     |       | Exclusion reason: Wrong population       |
| Hvidtfeldt, U. A.; Bjorner, J. I | 2017      | Cohort Profile: The Well-being in Hospital Employees (WHALE) study                                         | Int. J. Epidemiol.                  | 46     | 6     | Exclusion reason: Wrong study design     |
| Hadžibajramović, E.; Ahlborg     | 2019      | Concurrent and lagged effects of psychosocial job stressors on symptoms of burnout                         | Int. Arch. Occup. Environ. Health   | 92     | 7     | Exclusion reason: Wrong comparator       |
| Marklund, S.; Huang, K.; Zoh     | 2021      | Dentists working conditions—factors associated with perceived workload                                     | Acta Odontol. Scand.                | 79     | 4     | Exclusion reason: Wrong outcomes         |
| Kirchhoff, J. W.; Marks, A.; F   | 2021      | The impact of information and communication technology on doctors' and registered nurses' workin           | J. Multidiscip. Healthc.            | 14     |       | Exclusion reason: Wrong outcomes         |
| Strandell, R.                    | 2020      | Care workers under pressure – A comparison of the work situation in Swedish home care 2005 and 2           | Health Soc. Care Community          | 28     | 1     | Exclusion reason: Wrong study design     |
| Helgesson, M.; Marklund, S.;     | 2021      | Favorable Working Conditions Related to Health Behavior Among Nurses and Care Assistants in Sw             | Front. Public Health                | 9      |       | Exclusion reason: Wrong outcomes         |
| Lindberg, J.; Holmström, P.; I   | 2020      | A national perspective about the current work situation at modern radiotherapy departments                 | Clin. Transl. Radiat. Oncol.        | 24     |       | Exclusion reason: Wrong outcomes         |
| Lindmark, U.; Wagman, P.; W      | 2018      | Workplace health in dental care – a salutogenic approach                                                   | Int. J. Dent. Hyg.                  | 16     | 1     | Exclusion reason: Wrong comparator       |
| Ejlertsson, L.; Heijbel, B.; An  | 2021      | Strengthened workplace relationships facilitate recovery at work – qualitative experiences of an interv    | BMC Fam. Pract.                     | 22     | 1     | Exclusion reason: Wrong study design     |
| Cabezas-García, H. R.; Torres    | 2018      | Prevalence of work-related musculoskeletal disorders in professionals of the rehabilitation services an    | Fisioterapia                        | 40     | 3     | Exclusion reason: Wrong population       |
| Gustafsson, K.; Marklund, S.;    | 2020      | Presenteeism, psychosocial working conditions and work ability among care workers—a cross-sectio           | Int. J. Environ. Res. Public Health | 17     | 7     | Exclusion reason: Wrong outcomes         |
| Potrebny, T.; Igländ, J.; Espef  | 2022      | Individual and organizational features of a favorable work environment in nursing homes: a cross-sec       | BMC Health Serv. Res.               | 22     | 1     | Exclusion reason: Wrong outcomes         |
| Nilsen, P.; Fernemark, H.; Sei   | 2021      | Working conditions in primary care: a qualitative interview study with physicians in Sweden informe        | BMC Fam. Pract.                     | 22     | 1     | Exclusion reason: Wrong outcomes         |
| Bachmann, L.; Michaelsen, R.     | 2019      | Professional vulnerability in mental healthcare contexts: A focus group study of milieu-therapists' exp    | Nurs. Open                          | 6      | 3     | Exclusion reason: Wrong outcomes         |
| Vinstrup, J.; Jakobsen, M. D.;   | 2020      | Perceived Stress and Low-Back Pain Among Healthcare Workers: A Multi-Center Prospective Cohor              | Front. Public Health                | 8      |       | Exclusion reason: Wrong comparator       |
| Williamsson, A.; Dellve, L.; K   | 2019      | “Nurses’ use of visual management in hospitals—A longitudinal, quantitative study on its implicatio        | J. Adv. Nurs.                       | 75     | 4     | Exclusion reason: Wrong outcomes         |
| Wallin, S.; Fjellman-Wiklund,    | 2022      | Work motivation and occupational self-efficacy belief to continue working among ageing home care           | BMC Nurs.                           | 21     | 1     | Exclusion reason: Wrong comparator       |
| Leineweber, C.; Marklund, S.;    | 2020      | Work environment risk factors for the duration of all cause and diagnose-specific sickness absence at      | Occup. Environ. Med.                | 77     | 11    | Exclusion reason: Wrong comparator       |
| Van Den Berg, J.; Bäck, F.; H    | 2017      | Transition to a New Neonatal Intensive Care Unit: Positive Effects on Staff Working Environment a          | J. Perinat. Neonatal Nurs.          | 31     | 1     | Exclusion reason: Wrong outcomes         |
| Kaiser, S.; Patras, J.; Adolfsen | 2020      | Using the Job Demands–Resources Model to Evaluate Work-Related Outcomes Among Norwegian                    | SAGE Open                           | 10     | 3     | Exclusion reason: Wrong comparator       |
| Marklund, S.; Gustafsson, K.;    | 2019      | Working conditions and compensated sickness absence among nurses and care assistants in Sweden (           | BMJ Open                            | 9      | 11    | Exclusion reason: Wrong outcomes         |
| da Silva, S. M.; Braga, N. T.; S | 2020      | Musculoskeletal disorders and actions to reduce the occurrence in nursing workers                          | Rev. Enferm.                        | 28     |       | Exclusion reason: Wrong population       |
| Helgesson, M.; Marklund, S.;     | 2020      | Interaction effects of physical and psychosocial working conditions on risk for sickness absence: A p      | Int. J. Environ. Res. Public Health | 17     | 20    | Exclusion reason: Wrong outcomes         |
| Figueiredo, L. C.; Gratao, A. (  | 2021      | Musculoskeletal symptoms in formal and informal caregivers of elderly people                               | Rev Bras Enferm                     | 75     | 2     | Exclusion reason: Wrong population       |
| Anskär, E.; Falk, M.; Sverker,   | 2022      | ‘But there are so many referrals which are totally ... only generating work and irritation’: a qualitative | Scand. J. Prim. Health Care         |        |       | Exclusion reason: Wrong outcomes         |
| Areskoug Josefsson, K.; Avby     | 2018      | Workers' experiences of healthy work environment indicators at well-functioning primary care units i       | Scand. J. Prim. Health Care         |        | 4     | Exclusion reason: Wrong comparator       |
| Hislop, J.; Hensman, C.; Isaks   | 2022      | How Does Robot-Assisted Laparoscopic Surgery Impact Pain and Burnout Among Minimally Invasi                | Lect. Notes Comput. Sci.            | 13320  | LNCS  | Exclusion reason: Wrong publication type |
| Golay, D.; Sving, C.; Cajander   | 2022      | An Emotion-driven Approach to Hospital Physicians' Work-Related User Experience                            |                                     |        |       | Exclusion reason: Wrong publication type |
| Khamaj, A. M.; Ali, A. M.; Al    | 2022      | Investigating factors affecting musculoskeletal disorders: Predictive models for identifying caregivers    | Work                                | 72     | 4     | Exclusion reason: Wrong population       |
| Cargnin, Z. A.; Schneider, D.    | 2019      | Non-specific low back pain and its relation to the nursing work process                                    | Rev. Lat. Am. Enferm.               | 27     |       | Exclusion reason: Wrong population       |
| Gustafsson, K.; Marklund, S.;    | 2019      | Physical work environment factors affecting risk for disability pension due to mental or musculoskelc      | BMJ Open                            | 9      | 10    | Exclusion reason: Wrong comparator       |
| Bjaalid, G.; Olsen, E.; Melber   | 2020      | Institutional stress and job performance among hospital employees                                          | Int. J. Organ. Anal.                | 28     | 2     | Exclusion reason: Wrong outcomes         |
| Lunde, L. K.; Koch, M.; Knar     | 2017      | Associations of objectively measured sitting and standing with low-back pain intensity: A 6-month fo       | Scand. J. Work Environ. Health      | 43     | 3     | Exclusion reason: Wrong comparator       |
| Andersen, L. L.; Villadsen, E.;  | 2020      | Influence of physical and psychosocial working conditions for the risk of disability pension among ho      | Scand. J. Public Health             | 48     | 4     | Exclusion reason: Wrong comparator       |
| Håkansson, C.; Lexén, A.         | 2021      | The combination of psychosocial working conditions, occupational balance and sociodemographic cl           | BMC Health Serv. Res.               | 21     | 1     | Exclusion reason: Wrong outcomes         |
| Anskär, E.; Lindberg, M.; Fall   | 2019      | Legitimacy of work tasks, psychosocial work environment, and time utilization among primary care s         | Scand. J. Prim. Health Care         | 37     | 4     | Exclusion reason: Wrong outcomes         |
| Lundgren, D.; Ernst Bravell,     | 2020      | The Association Between Psychosocial Work Environment and Satisfaction With Old Age Care Am                | J. Appl. Gerontol.                  | 39     | 7     | Exclusion reason: Wrong outcomes         |
| Reijula, J.; Ruohomäki, V.       | 2018      | Perception of hospital environment before and after relocation                                             | Facilities                          | 36     | 5-6   | Exclusion reason: Wrong outcomes         |

|                                   |      |                                                                                                                                  |                                      |     |       |  |                                          |
|-----------------------------------|------|----------------------------------------------------------------------------------------------------------------------------------|--------------------------------------|-----|-------|--|------------------------------------------|
| Jeong, C. H.; Yazdanyar, N.       | 2020 | Noise level measured in danish dental clinics                                                                                    |                                      |     |       |  | Exclusion reason: Wrong publication type |
| Khansa, L.; Khansa, L.; Westv     | 2018 | Work-Related Musculoskeletal Injuries in Plastic Surgeons in the United States, Canada, and Norway                               | Plast. Reconstr. Surg.               | 141 | 1     |  | Exclusion reason: Wrong population       |
| Gadolin, C.; Skyvell Nilsson, I   | 2021 | Preconditions for nurses' perceived organizational support in healthcare: a qualitative explorative study                        | J. Health Organ. Manage.             | 35  | 9     |  | Exclusion reason: Wrong outcomes         |
| Andersen, L. H.; Christensen, M.  | 2022 | Taking Prior Sick Leave Patterns Into Account When Estimating Health Consequences of Violence                                    | Work. Health Safety                  | 70  | 11    |  | Exclusion reason: Wrong population       |
| Muthukrishnan, R.; Maqbool        | 2021 | Ergonomic risk factors and risk exposure level of nursing tasks: association with work-related musculoskeletal disorders         | Europ. J. Physiother.                | 23  | 4     |  | Exclusion reason: Wrong population       |
| Januario, L. B.; Karstad, K.; R   | 2019 | Association between psychosocial working conditions and perceived physical exertion among elderly nurses                         | Int. J. Environ. Res. Public Health  | 16  | 19    |  | Exclusion reason: Wrong outcomes         |
| Gluschko, K.; Hakanen, J. J.      | 2022 | The relative importance of work-related psychosocial factors in physician burnout                                                | Occup. Med.                          | 72  | 1     |  | Exclusion reason: Wrong comparator       |
| Backman, A.; Lindkvist, M.; I     | 2022 | Longitudinal changes in nursing home leadership, direct care staff job strain and social support in Sweden                       | Int. J. Older People Nurs.           |     |       |  | Exclusion reason: Wrong outcomes         |
| Stolt, M.; Miikkola, M.; Suhor    | 2018 | Nurses' Perceptions of Their Foot Health: Implications for Occupational Health Care                                              | Work. Health Safety                  | 66  | 3     |  | Exclusion reason: Wrong outcomes         |
| Marklund, S.; Mienna, C. S.; V    | 2020 | Work ability and productivity among dentists: associations with musculoskeletal pain, stress, and sleep                          | Int. Arch. Occup. Environ. Health    | 93  | 2     |  | Exclusion reason: Wrong comparator       |
| Milton, J.; Erichsen Andersso     | 2022 | Healthcare professionals' perceptions of interprofessional teamwork in the emergency department: a cross-sectional study         | Scand. J. Trauma Resusc. Emerg. Med. | 30  | 1     |  | Exclusion reason: Wrong outcomes         |
| Xu, H. G.; Johnston, A. N. B.     | 2019 | Stressors and coping strategies of emergency department nurses and doctors: A cross-sectional study                              | Australas. Emerg. Care               | 22  | 3     |  | Exclusion reason: Wrong population       |
| Furunes, T.; Kaltveit, A.; Ake    | 2018 | Health-promoting leadership: A qualitative study from experienced nurses' perspective                                            | J. Clin. Nurs.                       | 27  | 23-24 |  | Exclusion reason: Wrong outcomes         |
| Vainiomäki, S.; Aalto, A. M.; I   | 2017 | Better usability and technical stability could lead to better work-related well-being among physicians                           | Appl. Clin. Informatics              | 8   | 4     |  | Exclusion reason: Wrong outcomes         |
| Gustavsson, M. E.; Juth, N.; I    | 2022 | Dealing with difficult choices: a qualitative study of experiences and consequences of moral challenges in nursing               | Confl. Health                        | 16  | 1     |  | Exclusion reason: Wrong outcomes         |
| Torp, S.; Bergheim, L. T. J.      | 2022 | Working environment, work engagement and mental health problems among occupational and physical therapists                       | Scand. J. Occup. Ther.               |     |       |  | Exclusion reason: Wrong comparator       |
| Jutengren, G.; Jaldestad, E.; D   | 2020 | The potential importance of social capital and job crafting for work engagement and job satisfaction in the emergency department | Int. J. Environ. Res. Public Health  | 17  | 12    |  | Exclusion reason: Wrong outcomes         |
| Burr, H.; Pohrt, A.; Rugulies, M. | 2017 | Does age modify the association between physical work demands and deterioration of self-rated general health?                    | Scand. J. Work Environ. Health       | 43  | 3     |  | Exclusion reason: Wrong population       |
| Lukasse, M.; Henriksen, L.        | 2019 | Norwegian midwives' perceptions of their practice environment: A mixed methods study                                             | Nurs. Open                           | 6   | 4     |  | Exclusion reason: Wrong outcomes         |
| Mathisen, J.; Nguyen, T. L.; Jø   | 2022 | Impact of hypothetical improvements in the psychosocial work environment on sickness absence rates                               | Eur J Public Health                  | 32  | 5     |  | Exclusion reason: Wrong outcomes         |
| Wells, A. C.; Kjellman, M.; Hø    | 2019 | Operating hurts: a study of EAES surgeons                                                                                        | Surg. Endosc.                        | 33  | 3     |  | Exclusion reason: Wrong population       |
| Maneschiöld, P. O.; Lucaci-M      | 2021 | Nursing assistant's perceptions of the good work environment in municipal elderly care in Sweden                                 | J. Health Organ. Manage.             | 35  | 9     |  | Exclusion reason: Wrong outcomes         |
| Chan, K. A. C.; Molina, J. A.; J  | 2018 | Assessment of postural analysis in a dialysis clinic                                                                             | Adv. Intell. Syst. Comput.           | 590 |       |  | Exclusion reason: Wrong publication type |
| Mauno, S.; Ruokolainen, M.; I     | 2017 | Does recovery buffer against emotional labor in terms of motivational outcomes at work? Analyzing the role of recovery           | Appl. Nurs. Res.                     | 36  |       |  | Exclusion reason: Wrong outcomes         |
| Rec, E.                           | 2020 | What is the role of transformational leadership, work environment and patient safety culture for personal well-being?            | Nurs. Open                           | 7   | 6     |  | Exclusion reason: Wrong outcomes         |
| Berthelsen, H.; Owen, M.; We      | 2021 | Does workplace social capital predict care quality through job satisfaction and stress at the clinic? A cross-sectional study    | BMC Public Health                    | 21  | 1     |  | Exclusion reason: Wrong outcomes         |
| Bry, A.; Wigert, H.               | 2022 | Organizational climate and interpersonal interactions among registered nurses in a neonatal intensive care unit                  | J. Nurs. Manage.                     |     |       |  | Exclusion reason: Wrong outcomes         |
| Roelen, C. A. M.; van Hoffen      | 2018 | Psychosocial work environment and mental health-related long-term sickness absence among nurses                                  | Int. Arch. Occup. Environ. Health    | 91  | 2     |  | Exclusion reason: Wrong outcomes         |
| Derks, M. T. H.; Mishra, A. K     | 2018 | Understanding thermal comfort perception of nurses in a hospital ward work environment                                           | Build. Environ.                      | 140 |       |  | Exclusion reason: Wrong population       |
| Arakelian, E.; Rudolfsson, G.     | 2019 | I Stay—Swedish Specialist Nurses in the Perioperative Context and Their Reasons to Stay at Their Workplaces                      | J. Perianesth. Nurs.                 | 34  | 3     |  | Exclusion reason: Wrong outcomes         |
| Hildingsson, I.; Karlström, A.    | 2020 | A continuity of care project with two on-call schedules: Findings from a rural area in Sweden                                    | Sex. Reprod. Healthc.                | 26  |       |  | Exclusion reason: Wrong population       |
| Jakobsen, M. D.; Sundstrup, I     | 2017 | Psychosocial benefits of workplace physical exercise: Cluster randomized controlled trial                                        | BMC Public Health                    | 17  | 1     |  | Exclusion reason: Wrong study design     |
| Hølge-Hazelton, B.; Berthelsen    | 2021 | Why nurses stay in departments with low turnover: A constructivist approach                                                      | Nordic J. Nurs. Res.                 | 41  | 3     |  | Exclusion reason: Wrong outcomes         |
| Hage, T. W.; Isaksson Rø, K.;     | 2021 | Burnout among staff on specialized eating disorder units in Norway                                                               | J. Eating Disord.                    | 9   | 1     |  | Exclusion reason: Wrong outcomes         |
| Pihl-Thingvad, J.; Brandt, L. I   | 2018 | Consistent Use of Assistive Devices for Patient Transfer Is Associated With Less Patient-Initiated Violence                      | Work. Health Safety                  | 66  | 9     |  | Exclusion reason: Wrong outcomes         |
| Thapa, D. R.; Stengård, J.; Ek    | 2022 | Job demands, job resources, and health outcomes among nursing professionals in private and public hospitals                      | BMC Nurs.                            | 21  | 1     |  | Exclusion reason: Wrong outcomes         |
| Van Diepen, C.; Fors, A.; Ek      | 2022 | Associations between person-centred care and job strain, stress of conscience, and intent to leave among nurses                  | J. Clin. Nurs.                       | 31  | 5-6   |  | Exclusion reason: Wrong outcomes         |
| Debesay, J.; Arora, S.; Fougner   | 2022 | Organisational culture and ethnic diversity in nursing homes: a qualitative study of healthcare workers                          | BMC Health Serv. Res.                | 22  | 1     |  | Exclusion reason: Wrong comparator       |
| Krupic, F.; Sköldenberg, O.; S    | 2018 | Nurses' Experience of Patient Care in Multibed Hospital Rooms: Results From In-Depth Interviews                                  | J. Perianesth. Nurs.                 | 33  | 1     |  | Exclusion reason: Wrong outcomes         |
| Pedersen, L. M.; Jakobsen, A.     | 2023 | Positive association between social capital and the quality of health care service: A cross-sectional study                      | Int. J. Nurs. Stud.                  | 137 |       |  | Exclusion reason: Wrong outcomes         |
| Sjöberg, A.; Petersson-Ström      | 2020 | The burden of high workload on the health-related quality of life among home care workers in Northern Sweden                     | Int. Arch. Occup. Environ. Health    | 93  | 6     |  | Exclusion reason: Wrong comparator       |
| Serafin, L.; Bjerså, K.; Dobos    | 2019 | Nurse job satisfaction at a surgical ward - a comparative study between Sweden and Poland                                        | Med Pr                               | 70  | 2     |  | Exclusion reason: Wrong population       |
| Hörberg, A.; Jirve, M.; Kalén     | 2017 | We need support! A Delphi study about desirable support during the first year in the emergency medicine                          | Scand. J. Trauma Resusc. Emerg. Med. | 25  | 1     |  | Exclusion reason: Wrong outcomes         |
| Carstensen, K.; Jensen, E. K.;    | 2020 | Implementation of integrated operating rooms: How much time is saved and how do medical staff experience it?                     | BMJ Open                             | 10  | 7     |  | Exclusion reason: Wrong outcomes         |
| Eriksson, A.; Vulkan, P.; Dell    | 2022 | A Case Study of Critical Reasons Behind Hospital Nurses' Turnover Due to Challenges Across Syster J. Multidiscip. Healthc.       |                                      | 15  |       |  | Exclusion reason: Wrong outcomes         |
| Mikkelsen, A.; Olsen, E.          | 2019 | The influence of change-oriented leadership on work performance and job satisfaction in hospitals – Leadersh. in Health Serv.    |                                      | 32  | 1     |  | Exclusion reason: Wrong comparator       |
| Aronsson, G.; Marklund, S.; I     | 2021 | The changing nature of work – Job strain, job support and sickness absence among care workers and SSM                            | Popul. Health                        | 15  |       |  | Exclusion reason: Wrong outcomes         |
| Hörberg, A.; Kalén, S.; Jirve,    | 2018 | Treat me nice! -a cross-sectional study examining support during the first year in the emergency medicine                        | Scand. J. Trauma Resusc. Emerg. Med. | 26  | 1     |  | Exclusion reason: Wrong outcomes         |
| Selberg, R.; Sandberg, M.; Mu     | 2022 | Contradictions in Care: Ward Nurses' Experiences of Work and Management in the Swedish Public Hospital                           | NORDI. J. Fem. Gender Res.           | 30  | 2     |  | Exclusion reason: Wrong outcomes         |
| Le Floch, B.; Bastiaens, H.; La   | 2019 | Which positive factors give general practitioners job satisfaction and make general practice a rewarding profession?             | BMC Fam. Pract.                      | 20  | 1     |  | Exclusion reason: Wrong population       |
| Wentz, K.; Gyllensten, K.; Sli    | 2020 | Need for recovery in relation to effort from work and health in four occupations                                                 | Int. Arch. Occup. Environ. Health    | 93  | 2     |  | Exclusion reason: Wrong outcomes         |

|                                 |      |                                                                                                           |                                           |     |    |                                          |
|---------------------------------|------|-----------------------------------------------------------------------------------------------------------|-------------------------------------------|-----|----|------------------------------------------|
| Rodríguez-Socarrás, M.; Vasq    | 2018 | "Burnout syndrome": Stress, burnout and depression in Urology                                             | Arch. Esp. Urol.                          | 71  | 1  | Exclusion reason: Wrong language         |
| Schiller, H.; Lekander, M.; Ra  | 2017 | The impact of reduced worktime on sleep and perceived stress – A group randomized intervention st         | Scand. J. Work Environ. Health            | 43  | 2  | Exclusion reason: Wrong population       |
| Mikkola, L.; Suutala, E.; Parvi | 2018 | Social support in the workplace for physicians in specialization training                                 | Med. Educ. Online                         | 23  | 1  | Exclusion reason: Wrong outcomes         |
| Török, E.; Clark, A. J.; Jensen | 2018 | Work-unit social capital and long-term sickness absence: A prospective cohort study of 32 053 hospi       | Occup. Environ. Med.                      | 75  | 9  | Exclusion reason: Wrong comparator       |
| Jakobsen, M. D.; Vinstrup, J.   | 2022 | Factors associated with high physical exertion during healthcare work: Cross-sectional study among        | Work                                      | 71  | 4  | Exclusion reason: Wrong outcomes         |
| Sousa-Ribeiro, M.; Lindfors, I  | 2022 | Sustainable Working Life in Intensive Care: A Qualitative Study of Older Nurses                           | Int. J. Environ. Res. Public Health       | 19  | 10 | Exclusion reason: Wrong outcomes         |
| Arvidsson, I.; Gremark Simor    | 2020 | The impact of occupational and personal factors on musculoskeletal pain - A cohort study of female        | BMC Musculoskelet. Disord.                | 21  | 1  | Exclusion reason: Wrong comparator       |
| Sandberg, L.; Borell, L.; Edva  | 2018 | Job strain: A cross-sectional survey of dementia care specialists and other staff in Swedish home care    | J. Multidiscip.Healthc.                   | 11  |    | Exclusion reason: Wrong outcomes         |
| Ericsson, C. R.; Lindström, V   | 2022 | Paramedics' perceptions of job demands and resources in Finnish emergency medical services: a qual        | BMC Health Serv. Res.                     | 22  | 1  | Exclusion reason: Wrong outcomes         |
| Roczniawska, M.; Richter, A.    | 2020 | Predicting sustainable employability in swedish healthcare: The complexity of social job resources        | Int. J. Environ. Res. Public Health       | 17  | 4  | Exclusion reason: Wrong comparator       |
| Török, E.; Rod, N. H.; Ersbo    | 2020 | Can work-unit social capital buffer the association between workplace violence and long-term sickne       | Int. Arch. Occup. Environ. Health         | 93  | 3  | Exclusion reason: Wrong comparator       |
| Virtanen, M.; Myllyntausta, S.  | 2021 | Shift work, work time control, and informal caregiving as risk factors for sleep disturbances in an age   | Scand. J. Work Environ. Health            | 47  | 3  | Exclusion reason: Wrong population       |
| Larsson, A.; Westerberg, M.; l  | 2018 | Teamwork and safety climate in homecare: A mixed method study                                             | Int. J. Environ. Res. Public Health       | 15  | 11 | Exclusion reason: Wrong outcomes         |
| Andersson, I.; Eklund, A. J.; ¶ | 2022 | Prevalence, type, and reasons for missed nursing care in municipality health care in Sweden – A cross     | BMC Nurs.                                 | 21  | 1  | Exclusion reason: Wrong outcomes         |
| Wälinder, R.; Runeson-Brobe     | 2018 | A supportive climate and low strain promote well-being and sustainable working life in the operation      | Uppsala J. Med. Sci.                      | 123 | 3  | Exclusion reason: Wrong outcomes         |
| Pennbrant, S.; Däderman, A.     | 2021 | Job demands, work engagement and job turnover intentions among registered nurses: Explained by v          | Work                                      | 68  | 4  | Exclusion reason: Wrong outcomes         |
| Dalager, T.; Sogaard, K.; Boyl  | 2019 | Surgery Is Physically Demanding and Associated With Multisite Musculoskeletal Pain: A Cross-Sectic        | J. Surg. Res.                             | 240 |    | Exclusion reason: Wrong comparator       |
| Berthelsen, H.; Conway, P. M    | 2018 | Is organizational justice climate at the workplace associated with individual-level quality of care and o | Int. Arch. Occup. Environ. Health         | 91  | 2  | Exclusion reason: Wrong outcomes         |
| Hovlin, L.; Hallgren, J.; Dahl. | 2022 | The role of the home health care physician in mobile integrated care: a qualitative phenomenograpic       | BMC Geriatr.                              | 22  | 1  | Exclusion reason: Wrong outcomes         |
| Harrison, J.                    | 2019 | Organisational factors: impacting on health for ambulance personnel                                       | Int. J. Emerg. Serv.                      | 8   | 2  | Exclusion reason: Wrong publication type |
| Jakobsen, M. D.; Sundstrup, I   | 2017 | Factors affecting pain relief in response to physical exercise interventions among healthcare workers     | Scand. J. Med. Sci. Sports                | 27  | 12 | Exclusion reason: Wrong study design     |
| Banerjee, S.; Califano, R.; Cor | 2017 | Professional burnout in European young oncologists: results of the European Society for Medical Or        | Ann. Oncol.                               | 28  | 7  | Exclusion reason: Wrong population       |
| Strid, E. N.; Wählin, C.; Ros,  | 2021 | Health care workers' experiences of workplace incidents that posed a risk of patient and worker injur     | BMC Health Serv. Res.                     | 21  | 1  | Exclusion reason: Wrong outcomes         |
| Mehta, A. J.; Mathisen, J.; Ngi | 2022 | Chronic disorders, work-unit leadership quality and long-term sickness absence among 33 025 public        | Scand. J. Work Environ. Health            | 48  | 7  | Exclusion reason: Wrong comparator       |
| Hamnerius, N.; Svedman, C.;     | 2018 | Wet work exposure and hand eczema among healthcare workers: a cross-sectional study                       | Br. J. Dermatol.                          | 178 | 2  | Exclusion reason: Wrong comparator       |
| Kihlberg, J.; Hansson, B.; Hal  | 2022 | Magnetic resonance imaging incidents are severely underreported: a finding in a multicentre interview     | Eur. Radiol.                              | 32  | 1  | Exclusion reason: Wrong outcomes         |
| Van Laethem, M.; Beckers, D     | 2019 | Challenge and hindrance demands in relation to self-reported job performance and the role of restor       | J. Occup. Organ. Psychol.                 | 92  | 2  | Exclusion reason: Wrong outcomes         |
| Hansson, M.; Lundgren, I.; H    | 2021 | Professional courage to create a pathway within midwives' fields of work: a grounded theory study         | BMC Health Serv. Res.                     | 21  | 1  | Exclusion reason: Wrong outcomes         |
| Allesoe, K.; Holtermann, A.; l  | 2017 | Does influence at work modify the relation between high occupational physical activity and risk of he     | Int. Arch. Occup. Environ. Health         | 90  | 5  | Exclusion reason: Wrong outcomes         |
| Pekurinen, V.; Willman, L.; V.  | 2017 | Patient aggression and the wellbeing of nurses: A cross-sectional survey study in psychiatric and non-    | Int. J. Environ. Res. Public Health       | 14  | 10 | Exclusion reason: Wrong comparator       |
| Martinussen, P. E.; Davidsen,   | 2021 | 'Professional-supportive' versus 'economic-operational' management: the relationship between leader       | BMC Health Serv. Res.                     | 21  | 1  | Exclusion reason: Wrong comparator       |
| Eriksson, A.; Jutengren, G.; E  | 2021 | Job demands and functional resources moderating assistant and Registered Nurses' intention to leave       | Nurs. Open                                | 8   | 2  | Exclusion reason: Wrong outcomes         |
| Gold, J. E.; Punnett, L.; Gore  | 2017 | Predictors of low back pain in nursing home workers after implementation of a safe resident handling      | Occup. Environ. Med.                      | 74  | 6  | Exclusion reason: Wrong population       |
| Nurmeksela, A.; Mikkonen, S.    | 2021 | Relationships between nurse managers' work activities, nurses' job satisfaction, patient satisfaction, ar | BMC Health Serv. Res.                     | 21  | 1  | Exclusion reason: Wrong outcomes         |
| Hamnerius, N.; Svedman, C.;     | 2018 | Hand eczema and occupational contact allergies in healthcare workers with a focus on rubber additiv       | Contact Dermatitis                        | 79  | 3  | Exclusion reason: Wrong outcomes         |
| Silén, M.; Skytt, B.; Engström  | 2019 | Relationships between structural and psychological empowerment, mediated by person-centred proce          | Contact Dermatitis                        | 40  | 1  | Exclusion reason: Wrong comparator       |
| Aalto-Korte, K.; Koskela, K.;   | 2021 | Allergic contact dermatitis and other occupational skin diseases in health care workers in the Finni      | Contact Dermatitis                        | 84  | 4  | Exclusion reason: Wrong comparator       |
| Olsen, E.; Jensen, M. T.; Bjaal | 2019 | Job resources and outcomes in the process of bullying: a study in a Norwegian healthcare setting          | Increasing Occupational Health and Saf. i |     |    | Exclusion reason: Wrong publication type |
| Rosenberg, M. K.; Bonsaksen     | 2022 | Job Satisfaction Among Psychomotor Physiotherapists in Norway                                             | Inquiry                                   | 59  |    | Exclusion reason: Wrong comparator       |
| Vauhkonen, A.; Saaranen, T.;    | 2021 | Work community factors, occupational well-being and work ability in home care: A structural equatio       | Nurs. Open                                | 8   | 6  | Exclusion reason: Wrong outcomes         |
| Engström, M.; Högberg, H.; §    | 2021 | Staff working life and older persons' satisfaction with care: A multilevel, correlational design          | J. Nurs. Care Qual.                       | 36  | 1  | Exclusion reason: Wrong outcomes         |
| Appel, A. M.; Török, E.; Jens   | 2020 | The longitudinal association between shift work and headache: results from the Danish PRISME coh          | Int. Arch. Occup. Environ. Health         | 93  | 5  | Exclusion reason: Wrong comparator       |
| Jäppinen, K.; Roos, M.; Slater  | 2022 | Connection between nurse managers' stress from workload and overall job stress, job satisfaction anc      | Nordic J. Nurs. Res.                      | 42  | 2  | Exclusion reason: Wrong outcomes         |
| Ylitörmänen, T.; Turunen, H.    | 2019 | Good nurse–nurse collaboration implies high job satisfaction: A structural equation modelling appro       | Nurs. Open                                | 6   | 3  | Exclusion reason: Wrong outcomes         |
| Waage, S.; Bjorvatn, B.         | 2017 | Health, psychosocial and workplace characteristics may identify nurses and midwives at risk of high       | Evid.-Based Nurs.                         | 20  | 3  | Exclusion reason: Wrong publication type |
| Wesołowska, K.; Elovainio, M    | 2020 | Nativity status and workplace discrimination in registered nurses: Testing the mediating role of psych    | J. Adv. Nurs.                             | 76  | 7  | Exclusion reason: Wrong outcomes         |
| Hansen, M. C. T.; Schmidt, J.   | 2017 | Noise exposure during prehospital emergency physicians work on Mobile Emergency Care Units and            | Scand. J. Trauma Resusc. Emerg. Med.      | 25  | 1  | Exclusion reason: Wrong outcomes         |
| Setrinan Hansen, N. M.; Mikl    | 2021 | Physicians' experiences working in emergency medicine in a rural area in Northern Sweden: a qualitat      | Rural Remote Health                       | 21  | 3  | Exclusion reason: Wrong outcomes         |
| Ericsson, C. R.; Nordquist, H   | 2021 | Finnish paramedics' professional quality of life and associations with assignment experiences and def     | BMC Public Health                         | 21  | 1  | Exclusion reason: Wrong outcomes         |
| Gustafsson, N.; Salzmann-Eri    | 2016 | Effect of complex working conditions on nurses who exert coercive measures in forensic psychiatric        | J. Psychosocial Nurs. Ment. Health Serv.  | 54  | 9  | Exclusion reason: Wrong outcomes         |
| Gemark Simonsen, J.; Gard, C    | 2016 | Swedish Sonographers' perceptions of ergonomic problems at work and their suggestions for improv          | BMC Musculoskelet. Disord.                | 17  | 1  | Exclusion reason: Wrong outcomes         |

|                                  |      |                                                                                                          |                                             |      |    |                                          |
|----------------------------------|------|----------------------------------------------------------------------------------------------------------|---------------------------------------------|------|----|------------------------------------------|
| Kuokkanen, L.; Leino-Kilpi, I    | 2016 | Newly graduated nurses' empowerment regarding professional competence and other work-related fa          | BMC Nurs.                                   | 15   | 1  | Exclusion reason: Wrong outcomes         |
| Aagestad, C.; Tyssen, R.; Steri  | 2016 | Do work-related factors contribute to differences in doctor-certified sick leave? A prospective study    | BMC Public Health                           | 16   | 1  | Exclusion reason: Wrong population       |
| Vammen, M. A.; Mikkelsen, S      | 2016 | Emotional demands at work and the risk of clinical depression a longitudinal study in the danish pub     | J. Occup. Environ. Med.                     | 58   | 10 | Exclusion reason: Wrong outcomes         |
| Rehnström, K.; Dahlborg-Lyc      | 2016 | Proactive Interventions: An Observational Study at a Swedish Emergency Department                        | SAGE Open                                   | 6    | 3  | Exclusion reason: Wrong outcomes         |
| Geç, A.; Kahraman, T.; Göz       | 2016 | The prevalence differences of musculoskeletal problems and related physical workload among hospi         | J. Back Musculoskelet. Rehabil.             | 29   | 3  | Exclusion reason: Wrong population       |
| Allesøe, K.; Sogaard, K.; Aad    | 2016 | Are hypertensive women at additional risk of ischaemic heart disease from physically demanding wor       | Eur. J. Prev. Cardiol.                      | 23   | 10 | Exclusion reason: Wrong comparator       |
| Brännström, K. J.; Holm, L.; J   | 2016 | Occupational stress among Swedish audiologists in clinical practice: Reasons for being stressed          | Int. J. Audiol.                             | 55   | 8  | Exclusion reason: Wrong study design     |
| Heikkilä, T. J.; Hyppölä, H.; V  | 2016 | What predicts doctors' satisfaction with their chosen medical specialty? A Finnish national study        | BMC Med. Educ.                              | 16   | 1  | Exclusion reason: Wrong comparator       |
| Ree, E.; Wüig, S.                | 2020 | Linking transformational leadership, patient safety culture and work engagement in home care service     | Nurs Open                                   | 7    | 1  | Exclusion reason: Wrong comparator       |
| Assander, S.; Bergström, A.; C   | 2022 | Individual and organisational factors in the psychosocial work environment are associated with home      | BMC Health Serv Res                         | 22   | 1  | Exclusion reason: Wrong outcomes         |
| Sulander, J.; Sinervo, T.; Elov  | 2016 | Does Organizational Justice Modify the Association Between Job Involvement and Retirement Inten          | Res Nurs Health                             | 39   | 5  | Exclusion reason: Wrong outcomes         |
| Håkansson, C.; Lexén, A.         | 2022 | Work conditions as predictors of Swedish occupational therapists' occupational balance                   | Scand J Occup Ther                          |      |    | Exclusion reason: Wrong outcomes         |
| Nunstedt, H.; Eriksson, M.; C    | 2020 | Salutary factors and hospital work environments: a qualitative descriptive study of nurses in Sweden     | BMC Nursing                                 | 19   | 1  | Exclusion reason: Wrong outcomes         |
| Mattsson, S.; Gustafsson, M.     | 2020 | Job Satisfaction among Swedish Pharmacists                                                               | Pharmacy (Basel)                            | 8    | 3  | Exclusion reason: Wrong comparator       |
| Reknes, I.; Notelaers, G.; Mağ   | 2017 | Aggression from Patients or Next of Kin and Exposure to Bullying Behaviors: A Conglomerate Expt          | Nurs Res Pract                              | 2017 |    | Exclusion reason: Wrong comparator       |
| Astvik, Wanja; Welander, Jon     | 2021 | A comparative study of how social workers' voice and silence strategies relate to organisational resou   | Journal of Social Work                      | 21   | 2  | Exclusion reason: Wrong population       |
| Ventovaara, Päivi; af Sandebe    | 2022 | A cross-sectional survey of moral distress and ethical climate – Situations in paediatric oncology care  | Nursing Open                                | 9    | 4  | Exclusion reason: Wrong outcomes         |
| Norrman Harling, Malin; Hög      | 2020 | Breaking the taboo: eight Swedish clinical psychologists' experiences of compassion fatigue              | International Journal of Qualitative Studie | 15   | 1  | Exclusion reason: Wrong outcomes         |
| Fischer, Shelly A.; Jones, Jacq  | 2018 | Consensus achievement of leadership, organisational and individual factors that influence safety clim    | Journal of Nursing Management (John W       | 26   | 1  | Exclusion reason: Wrong population       |
| Arvidsson, Inger; Gremark Si     | 2016 | Cross-sectional associations between occupational factors and musculoskeletal pain in women teache       | BMC Musculoskeletal Disorders               | 17   |    | Exclusion reason: Wrong population       |
| Hansen, Åse Marie; Brodsgaa      | 2018 | Does Workplace Bullying Affect Long-Term Sickness Absence Among Coworkers?                               | Journal of Occupational & Environmenta      | 60   | 2  | Exclusion reason: Wrong comparator       |
| Allerby, Katarina; Goulding, J   | 2019 | F132. PERSON-CENTERED PSYCHOSIS CARE (PCPC) IN AN INPATIENT SETTING: WAF                                 | Schizophrenia Bulletin                      | 45   |    | Exclusion reason: Wrong publication type |
| Tuononen, Tiina; Lammintak       | 2017 | Factors supporting dentist leaders' retention in leadership                                              | Community Dental Health                     | 34   | 4  | Exclusion reason: Wrong outcomes         |
| Lampinen, Mai-Stiina; Konu,      | 2018 | Factors that foster or prevent sense of belonging among social and health care managers                  | Leadership in Health Services (1751-1879)   | 31   | 4  | Exclusion reason: Wrong outcomes         |
| Sørensen, Tanja; Tingleff, Ell   | 2018 | Feeling Safe and Taking on Responsibilities: Newly Graduated Nurses' Perceptions and Evaluations         | Journal of Forensic Nursing                 | 14   | 3  | Exclusion reason: Wrong outcomes         |
| André, Beate; Jacobsen, Frodi    | 2022 | How is leadership experienced in joy-of-life-nursing-homes compared to ordinary nursing homes: a         | BMC Nursing                                 | 21   | 1  | Exclusion reason: Wrong outcomes         |
| Paunova, Minna; Li-Ying, Jas     | 2023 | Interactive effects of self-concept and social context on perceived cohesion in intensive care nursing   | Applied Psychology: An International Rev    | 72   | 1  | Exclusion reason: Wrong outcomes         |
| Molin, Jenny; Strömbäck, Ma      | 2021 | It's Not Just in the Walls: Patient and Staff Experiences of a New Spatial Design for Psychiatric Inpat  | Issues in Mental Health Nursing             | 42   | 12 | Exclusion reason: Wrong outcomes         |
| Hansson, Malin; Dencker, An      | 2022 | Job satisfaction in midwives and its association with organisational and psychosocial factors at work:   | BMC Health Services Research                | 22   | 1  | Exclusion reason: Wrong study design     |
| Greenslade, Jaimi H.; Wallis, I  | 2020 | Key occupational stressors in the ED: an international comparison                                        | Emergency Medicine Journal                  | 37   | 2  | Exclusion reason: Wrong outcomes         |
| Lundgren, Dan; Ernsht-Brave      | 2016 | Leadership and the psychosocial work environment in old age care                                         | International Journal of Older People Nu    | 11   | 1  | Exclusion reason: Wrong outcomes         |
| Arakelian, Erebooni; Rudolfs     | 2021 | Managerial challenges faced by Swedish nurse managers in perioperative settings—a qualitative study      | BMC Nursing                                 | 20   | 1  | Exclusion reason: Wrong outcomes         |
| Cajander, Åsa; Moll, Jonas; E    | 2018 | Medical Records Online for Patients and Effects on the Work Environment of Nurses                        | Studies in Health Technology & Informat     | 247  |    | Exclusion reason: Wrong publication type |
| Andresen, Ida Hellum; Hanse      | 2017 | Norwegian nurses' quality of life, job satisfaction, as well as intention to change jobs                 | Nordic Journal of Nursing Research          | 37   | 2  | Exclusion reason: Wrong outcomes         |
| Niinihuhta, Milja; Terkamo-V     | 2022 | Nurse leaders' work-related well-being—Relationships to a superior's transformational leadership styl    | Journal of Nursing Management (John W       | 30   | 7  | Exclusion reason: Wrong comparator       |
| Stevens, Matthew L.; Karstad,    | 2022 | Nursing Home, Ward and Worker Level Determinants of Perceived Quantitative Work Demands: A               | Annals of Work Exposures & Health           | 66   | 8  | Exclusion reason: Wrong outcomes         |
| Tu vesson, Hanna; Eklund, M      | 2017 | Nursing Staff Stress and Individual Characteristics in Relation to the Ward Atmosphere in Psychiatri     | Issues in Mental Health Nursing             | 38   | 9  | Exclusion reason: Wrong outcomes         |
| Arnetz, Judith E.; Zhdanova,     | 2016 | Patient Involvement: A New Source of Stress in Health Care Work?                                         | Health Communication                        | 31   | 12 | Exclusion reason: Wrong outcomes         |
| TÄHTinen, Katja; Remes, Jou      | 2020 | Perceived indoor air quality and psychosocial work environment in office, school and health care env     | International Journal of Occupational Me    | 33   | 4  | Exclusion reason: Wrong comparator       |
| Heponiemi, Tarja; Hyppönen       | 2018 | Predictors of physicians' stress related to information systems: a nine-year follow-up survey study      | BMC Health Services Research                | 18   | 1  | Exclusion reason: Wrong outcomes         |
| Bonsaksen, Tore; Nerdrum, F      | 2021 | Psychological distress and its associations with psychosocial work environment factors in four profes    | Nursing & Health Sciences                   | 23   | 3  | Exclusion reason: Wrong outcomes         |
| Karlsson, Ann-Christin; Gun      | 2019 | Registered nurses' perspectives of work satisfaction, patient safety and intention to stay – A double-et | Journal of Nursing Management (John W       | 27   | 7  | Exclusion reason: Wrong outcomes         |
| Dean, Erin                       | 2017 | Sickness absence halved in trial of six-hour day                                                         | Nursing Standard                            | 31   | 20 | Exclusion reason: Wrong publication type |
| Crilly, Julia; Greenslade, Jaimi | 2019 | Staff perceptions of the emergency department working environment: An international cross-section        | Emergency Medicine Australasia              | 31   | 6  | Exclusion reason: Wrong population       |
| Öhman, Ann; Keisu, Britt-Ing     | 2017 | Team social cohesion, professionalism, and patient-centeredness: Gendered care work, with special r      | BMC Health Services Research                | 17   |    | Exclusion reason: Wrong outcomes         |
| Sveinsdóttir, Herdís; Blöndal,   | 2018 | The content of nurse unit managers' work: a descriptive study using daily activity diaries               | Scandinavian Journal of Caring Sciences     | 32   | 2  | Exclusion reason: Wrong outcomes         |
| Kaihlanen, Anu-Marja; Glusel     | 2021 | The information system stress, informatics competence and well-being of newly graduated and exper        | BMC Health Services Research                | 21   | 1  | Exclusion reason: Wrong comparator       |
| Saukkonen, Petra; Elovainio,     | 2022 | The Interplay of Work, Digital Health Usage, and the Perceived Effects of Digitalization on Physicia     | Journal of Medical Internet Research        | 24   | 8  | Exclusion reason: Wrong outcomes         |
| Allwood, Carl Martin; Geisler    | 2022 | The relationship between personality, work, and personal factors to burnout among clinical psycholo      | Counselling Psychology Quarterly            | 35   | 2  | Exclusion reason: Wrong comparator       |
| Lyyra, Evva; Roos, Mervi; Suc    | 2021 | The workplace culture in addiction psychiatry in Finland as described by healthcare personnel            | Advances in Dual Diagnosis                  | 14   | 3  | Exclusion reason: Wrong outcomes         |
| Anskär, Eva; Lindberg, Malou     | 2018 | Time utilization and perceived psychosocial work environment among staff in Swedish primary care         | BMC Health Services Research                | 18   |    | Exclusion reason: Wrong outcomes         |

|                                  |      |                                                                                                             |                                           |     |             |                                          |
|----------------------------------|------|-------------------------------------------------------------------------------------------------------------|-------------------------------------------|-----|-------------|------------------------------------------|
| Lohikoski, K.; Roos, M.; Suor    | 2019 | Workplace culture assessed by radiographers in Finland                                                      | Radiography                               | 25  | 4           | Exclusion reason: Wrong study design     |
| Gadolin, Christian; Larsman,     | 2022 | How do healthcare unit managers promote nurses' perceived organizational support, and which work            | Scandinavian Journal of Psychology        | 63  | 6           | Exclusion reason: Wrong outcomes         |
| Eklöf, Britta; Larsson, Hanna    | 2022 | The role of self-reported stressors in recovery from exhaustion disorder: A longitudinal study              | BMC Psychiatry                            | 22  |             | Exclusion reason: Wrong outcomes         |
| Frennert, Susanne; Erlingsdóttir | 2022 | 'it increases my ability to influence my ways of working': A qualitative study on digitally mediated pati   | Scandinavian Journal of Caring Sciences   |     |             | Exclusion reason: Wrong setting          |
| Ineland, Jens; Starke, Mikaela   | 2022 | Factors associated with positive work experience among professionals supporting people with intelle         | International Journal of Developmental E  | 68  | 4           | Exclusion reason: Wrong outcomes         |
| Honkalampi, Kirsi; Kupari, S     | 2022 | The association between chronotype and sleep quality among female home care workers performing              | Chronobiology International               | 39  | 5           | Exclusion reason: Wrong outcomes         |
| Larsson, Ing-Marie; Aronsson     | 2022 | Healthcare workers' structured daily reflection on patient safety, workload and work environment in i       | Intensive and Critical Care Nursing       | 68  |             | Exclusion reason: Wrong outcomes         |
| Bunkenborg, Gitte; Barfod O      | 2022 | Balancing responsibilities, rewards and challenges: A qualitative study illuminating the complexity of l    | Journal of Clinical Nursing               |     |             | Exclusion reason: Wrong outcomes         |
| Wadman, Cecilia                  | 2022 | Psychosocial work conditions and musculoskeletal complaint: The role of affective stress response as        |                                           |     | AAI28426849 | Exclusion reason: Wrong publication type |
| Bujacz, Aleksandra; Rudman,      | 2021 | Psychosocial working conditions of shiftworking nurses: A long-term latent transition analysis              | Journal of Nursing Management             | 29  | 8           | Exclusion reason: Wrong outcomes         |
| Brubakk, Kirsten; Svendsen, I    | 2021 | Hospital work environments affect the patient safety climate: A longitudinal follow-up using a logisti      | PLOS ONE                                  | 16  | 10          | Exclusion reason: Wrong outcomes         |
| Söderbacka, Tina; Nyholm, Li     | 2021 | What is giving vitality to continue at work? A qualitative study of older health professionals' vitality st | Scandinavian Journal of Caring Sciences   |     |             | Exclusion reason: Wrong comparator       |
| Tangsgaard, Emily Rose           | 2021 | How do public service professionals behave in risky situations? The importance of organizational cul        | The American Review of Public Administ    | 51  | 7           | Exclusion reason: Wrong outcomes         |
| Huhtala, Mari; Geurts, Sabine    | 2021 | Intensified job demands in healthcare and their consequences for employee well-being and patient sa         | Journal of Advanced Nursing               | 77  | 9           | Exclusion reason: Wrong comparator       |
| Pettersson, Cecilia; Nilsson, M  | 2021 | The impact of the physical environment for caregiving in ordinary housing: Experiences of staff in h        | Applied Ergonomics                        | 92  |             | Exclusion reason: Wrong outcomes         |
| Munch, Pernille Kold; Nørreg     | 2021 | Which work environment challenges are top of mind among eldercare workers and how would they                | Applied Ergonomics                        | 90  |             | Exclusion reason: Wrong outcomes         |
| Ejlertsson, Lina; Heijbel, Bod   | 2020 | Is it possible to gain energy at work? A questionnaire study in primary health care                         | Primary Health Care Research and Devel    | 21  |             | Exclusion reason: Wrong outcomes         |
| Ahlstedt, Carina; Eriksson Lir   | 2020 | Flourishing at work: Nurses' motivation through daily communication—An ethnographic approach                | Nursing & Health Sciences                 | 22  | 4           | Exclusion reason: Wrong outcomes         |
| Kalanlar, Bilge; Kuru Alici, N   | 2020 | The effect of care burden on formal caregiver's quality of work life: A mixed-methods study                 | Scandinavian Journal of Caring Sciences   | 34  | 4           | Exclusion reason: Wrong population       |
| Bragadóttir, Helga; Burmeister   | 2020 | The association of missed nursing care and determinants of satisfaction with current position for dire      | Journal of Nursing Management             | 28  | 8           | Exclusion reason: Wrong population       |
| Jensen, Johan Hoy; Flachs, E     | 2020 | Work-unit social capital and incident purchase of psychotropic medications: A longitudinal cohort-st        | Journal of Affective Disorders            | 276 |             | Exclusion reason: Wrong outcomes         |
| Karhula, Kati; Wöhrmann, A       | 2020 | Working time dimensions and well-being: A cross-national study of Finnish and German health care            | Chronobiology International               | 37  | 9-10        | Exclusion reason: Wrong comparator       |
| Midjo, Turid; Redzovic, Sken     | 2020 | The complexity of work expectations of staff in supported housing                                           | Social Work in Mental Health              | 18  | 5           | Exclusion reason: Wrong outcomes         |
| Alenius, Lisa Smeds; Lindqvist   | 2020 | Between a rock and a hard place: Registered nurses' accounts of their work situation in cancer care in      | European Journal of Oncology Nursing      | 47  |             | Exclusion reason: Wrong outcomes         |
| Török, Eszter; Clark, Alice Je   | 2020 | Physical workload, long-term sickness absence, and the role of social capital. Multi-level analysis of a    | Scandinavian Journal of Work, Environm    | 46  | 4           | Exclusion reason: Wrong outcomes         |
| Vanttola, Päivi; Puttonen, San   | 2020 | Prevalence of shift work disorder among hospital personnel: A cross-sectional study using objective v       | Journal of Sleep Research                 | 29  | 3           | Exclusion reason: Wrong study design     |
| Ibrahim, Maha E.; Cheval, Bo     | 2020 | Back pain occurrence and treatment-seeking behavior among nurses: The role of work-related emoti            | Quality of Life Research: An Internationa | 29  | 5           | Exclusion reason: Wrong population       |
| Gustafsson, Klas; Marklund, S    | 2020 | Interaction effects of physical and psychosocial working conditions on the risk of disability pension a     | International Journal of Nursing Studies  | 102 |             | Exclusion reason: Wrong outcomes         |
| Gyllenstein, Kristina; Wentz, I  | 2019 | Older assistant nurses' motivation for a full or extended working life                                      | Ageing & Society                          | 39  | 12          | Exclusion reason: Wrong outcomes         |
| Johansen, Ayna B.; Kristiansen   | 2019 | Secondary traumatic stress in Norwegian SUD-therapists: Symptoms and related factors                        | Nordic Studies on Alcohol and Drugs       | 36  | 6           | Exclusion reason: Wrong outcomes         |
| Pergert, Pernilla; Bartholdson   | 2019 | Moral distress in paediatric oncology: Contributing factors and group differences                           | Nursing Ethics                            | 26  | 7-8         | Exclusion reason: Wrong outcomes         |
| Hagerman, Heidi; Engström,       | 2019 | How do first-line managers in elderly care experience their work situation from a structural and psych      | Journal of Nursing Management             | 27  | 6           | Exclusion reason: Wrong outcomes         |
| Leineweber, Constanze; Mark      | 2019 | Work-related psychosocial risk factors and risk of disability pension among employees in health and j       | International Journal of Nursing Studies  | 93  |             | Exclusion reason: Wrong comparator       |
| Jakobsen, Markus D.; Aust, B     | 2019 | Participatory organizational intervention for improved use of assistive devices in patient transfer: A si   | Scandinavian Journal of Work, Environm    | 45  | 2           | Exclusion reason: Wrong outcomes         |
| Burmeister, Elizabeth A.; Kali   | 2019 | Determinants of nurse absenteeism and intent to leave: An international study                               | Journal of Nursing Management             | 27  | 1           | Exclusion reason: Wrong population       |
| Schön Persson, Sophie; Nilsson   | 2018 | Resources for work-related well-being: A qualitative study about healthcare employees' experiences o        | Journal of Clinical Nursing               | 27  | 23-24       | Exclusion reason: Wrong comparator       |
| Wahlberg, Anna Carin; Björk      | 2018 | Expert in nursing care but sometimes disrespected—'Telenurses' reflections on their work environm           | Journal of Clinical Nursing               | 27  | 21-22       | Exclusion reason: Wrong comparator       |
| Ylitörmänen, Tuja; Turunen,      | 2018 | Job satisfaction among registered nurses in two Scandinavian acute care hospitals                           | Journal of Nursing Management             | 26  | 7           | Exclusion reason: Wrong outcomes         |
| Aalto, Anna-Mari; Heponiemi      | 2018 | Social relationships in physicians' work moderate relationship between workload and wellbeing—9-y           | European Journal of Public Health         | 28  | 5           | Exclusion reason: Wrong comparator       |
| Roen, Irene; Kirkevold, Öyvii    | 2018 | Person-centered care in Norwegian nursing homes and its relation to organizational factors and staff        | International Psychogeriatrics            | 30  | 9           | Exclusion reason: Wrong outcomes         |
| Gustafsson, Maria; Mattsson,     | 2018 | Pharmacists' satisfaction with their work: Analysis of an alumni survey                                     | Research in Social & Administrative Phari | 14  | 7           | Exclusion reason: Wrong outcomes         |
| Hylén, Ulrika; Kjellin, Lars; P  | 2018 | Psychosocial work environment within psychiatric inpatient care in Sweden: Violence, stress, and vah        | International Journal of Mental Health Nu | 27  | 3           | Exclusion reason: Wrong outcomes         |
| Lepistö, Sari; Alanen, Seija; A  | 2018 | Healthcare professionals' work engagement in Finnish university hospitals                                   | Scandinavian Journal of Caring Sciences   | 32  | 2           | Exclusion reason: Wrong comparator       |
| Backman, Annica; Sjögren, K      | 2018 | Job strain in nursing homes—Exploring the impact of leadership                                              | Journal of Clinical Nursing               | 27  | 7-8         | Exclusion reason: Wrong outcomes         |
| Holmberg, Christopher; Caro      | 2018 | Job satisfaction among Swedish mental health nursing personnel: Revisiting the two-factor theory            | International Journal of Mental Health Nu | 27  | 2           | Exclusion reason: Wrong outcomes         |
| Kirkegaard, Marie Louise; Kir    | 2018 | Occupational safety across jobs and shifts in emergency departments in Denmark                              | Safety Science                            | 103 |             | Exclusion reason: Wrong outcomes         |
| Kaisu, Britt-Inger; Öhman, A     | 2018 | Employee effort—Reward balance and first-level manager transformational leadership within elderly           | Scandinavian Journal of Caring Sciences   | 32  | 1           | Exclusion reason: Wrong outcomes         |
| Rugulies, Reiner; Jakobsen, L    | 2018 | Managerial quality and risk of depressive disorders among Danish eldercare workers: A multilevel col        | Journal of Occupational and Environmen    | 60  | 2           | Exclusion reason: Wrong outcomes         |
| Ejlertsson, Lina; Heijbel, Bod   | 2018 | Variation, companionship and manageability important for recovery during working hours: A qualita           | Work: Journal of Prevention, Assessment   | 61  | 1           | Exclusion reason: Wrong outcomes         |
| Nielsen, Helena B.; Larsen, A    | 2018 | Risk of injury after evening and night work—Findings from the Danish Working Hour Database                  | Scandinavian Journal of Work, Environm    | 44  | 4           | Exclusion reason: Wrong comparator       |
| Nourollahi, Maryam; Afshari,     | 2018 | Awkward trunk postures and their relationship with low back pain in hospital nurses                         | Work: Journal of Prevention, Assessment   | 59  | 3           | Exclusion reason: Wrong population       |

|                                                     |      |                                                                                                                                                |                                                        |      |   |                                    |
|-----------------------------------------------------|------|------------------------------------------------------------------------------------------------------------------------------------------------|--------------------------------------------------------|------|---|------------------------------------|
| Ejlertsson, Lina; Heijbel, Bod                      | 2018 | Recovery, work-life balance and work experiences important to self-rated health: A questionnaire study                                         | Work: Journal of Prevention, Assessment                | 59   | 1 | Exclusion reason: Wrong outcomes   |
| Yepes-Baldó, Montserrat; Roig, Miquel               | 2018 | Job crafting, employee well-being, and quality of care                                                                                         | Western Journal of Nursing Research                    | 40   | 1 | Exclusion reason: Wrong outcomes   |
| Billsten, Johan; Fridell, Mats; Eriksson, Lena      | 2018 | Organizational Readiness for Change (ORC) test used in the implementation of assessment instruments                                            | Journal of Substance Abuse Treatment                   | 84   |   | Exclusion reason: Wrong outcomes   |
| Kurjenluoma, K.; Rantanen, Leena                    | 2017 | Workplace culture in psychiatric nursing described by nurses                                                                                   | Scandinavian Journal of Caring Sciences                | 31   | 4 | Exclusion reason: Wrong comparator |
| Astala, Lena; Roos, Mervi; Hämäläinen, Marjaana     | 2017 | Staff experiences of appreciative management in the institutional care of people with intellectual and developmental disabilities              | Scandinavian Journal of Caring Sciences                | 31   | 4 | Exclusion reason: Wrong outcomes   |
| Andreassen, Cecilie S.; Bakke, Elin                 | 2017 | Working conditions and individual differences are weakly associated with workaholism: A 2-3-year prospective study                             | Frontiers in Psychology                                | 8    |   | Exclusion reason: Wrong outcomes   |
| Trudel-Fitzgerald, Claudia; Peck, Elizabeth         | 2017 | The association of work characteristics with ovarian cancer risk and mortality                                                                 | Psychosomatic Medicine                                 | 79   | 9 | Exclusion reason: Wrong population |
| Casalicchio, Giuseppe; Lesaffre, Emmanuelle         | 2017 | Nonlinear analysis to detect if excellent nursing work environments have highest well-being                                                    | Journal of Nursing Scholarship                         | 49   | 5 | Exclusion reason: Wrong population |
| Karhula, Kati; Puttonen, Samu; Kinnunen, Marjaana   | 2017 | Objective working hour characteristics and work-life conflict among hospital employees in the Finnish health care sector                       | Chronobiology International                            | 34   | 7 | Exclusion reason: Wrong outcomes   |
| Hakanen, Jari J.; Seppälä, Piia; Kinnunen, Marjaana | 2017 | High job demands, still engaged and not burned out? The role of job crafting                                                                   | International Journal of Behavioral Medicine           | 24   | 4 | Exclusion reason: Wrong comparator |
| Pekurinen, Virve Maaret; Väli, Marjaana             | 2017 | Organizational justice and collaboration among nurses as correlates of violent assaults by patients in psychiatric wards                       | Psychiatric Services                                   | 68   | 5 | Exclusion reason: Wrong outcomes   |
| Riisgaard, Helle; Sondergaard, Mette                | 2017 | Work motivation, task delegation and job satisfaction of general practice staff: A cross-sectional study                                       | Family Practice                                        | 34   | 2 | Exclusion reason: Wrong outcomes   |
| Nesje, Kjersti; Skjott-Larsen, Siri                 | 2017 | Professional commitment: Does it buffer or intensify job demands?                                                                              | Scandinavian Journal of Psychology                     | 58   | 2 | Exclusion reason: Wrong comparator |
| Uronen, L.; Heimonen, J.; Puttonen, Samu            | 2017 | Health check documentation of psychosocial factors using the WAI                                                                               | Occupational Medicine                                  | 67   | 2 | Exclusion reason: Wrong population |
| Olafsen, Anja H.; Niemiec, Clotilde                 | 2017 | On the dark side of work: A longitudinal analysis using self-determination theory                                                              | European Journal of Work and Organizational Psychology | 26   | 2 | Exclusion reason: Wrong comparator |
| Mahmood, Javed Iqbal; Groth, Maria                  | 2017 | Contextual factors and mental distress as possible predictors of hazardous drinking in norwegian men                                           | European Addiction Research                            | 23   | 1 | Exclusion reason: Wrong outcomes   |
| Lantta, Tella; Anttila, Minna; Laksy, Anja          | 2016 | Violent events, ward climate and ideas for violence prevention among nurses in psychiatric wards: A cross-sectional study                      | International Journal of Mental Health Services        | 10   |   | Exclusion reason: Wrong outcomes   |
| Meagher, Gabrielle; Szebehely, Zsuzsanna            | 2016 | How institutions matter for job characteristics, quality and experiences: A comparison of home care workers and employees in the public sector | Work, Employment and Society                           | 30   | 5 | Exclusion reason: Wrong population |
| Jakobsen, Louise M.; Jørgensen, Mette               | 2016 | Emotion work within eldercare and depressive symptoms: A cross-sectional multi-level study assessing the role of organizational factors        | International Journal of Nursing Studies               | 62   |   | Exclusion reason: Wrong comparator |
| Eskola, Suvi; Roos, Mervi; Mäkelä, Marjaana         | 2016 | Workplace culture among operating room nurses                                                                                                  | Journal of Nursing Management                          | 24   | 6 | Exclusion reason: Wrong outcomes   |
| Saksvik-Lehouillier, Ingvild; Fjell, Ingrid         | 2016 | Hardiness, psychosocial factors and shift work tolerance among nurses – A 2-year follow-up study                                               | Journal of Advanced Nursing                            | 72   | 8 | Exclusion reason: Wrong outcomes   |
| Päätaalo, Kati; Kyngäs, Helvi; Kinnunen, Marjaana   | 2016 | Well-being at work: Graduating nursing students' perspective in Finland                                                                        | Contemporary Nurse                                     | 52   | 5 | Exclusion reason: Wrong population |
| Vedaa, Øystein; Krossbakken, Kjetil                 | 2016 | Prospective study of predictors and consequences of insomnia: Personality, lifestyle, mental health, and sleep                                 | Sleep Medicine                                         | 20   |   | Exclusion reason: Wrong outcomes   |
| Sveinsdóttir, Herdís; Ragnarsdóttir, Sigrún         | 2016 | Praise matters: The influence of nurse unit managers' praise on nurses' practice, work environment and job satisfaction                        | Journal of Advanced Nursing                            | 72   | 3 | Exclusion reason: Wrong comparator |
| Tuisku, Katinka; Pulkki-Räbän, Sanna                | 2016 | Cultural events provided by employer and occupational wellbeing of employees: A cross-sectional study                                          | Work: Journal of Prevention, Assessment                | 55   | 1 | Exclusion reason: Wrong outcomes   |
| Freimann, Tiina; Pääsuke, Marjaana                  | 2016 | Work-related psychosocial factors and mental health problems associated with musculoskeletal pain in health care workers                       | Pain Research & Management                             | 2016 |   | Exclusion reason: Wrong population |
| Heponiemi, Tarja; Presseau, Jean-François           | 2016 | On-call work and physicians' turnover intention: The moderating effect of job strain                                                           | Psychology, Health & Medicine                          | 21   | 1 | Exclusion reason: Wrong outcomes   |
| Kinnunen, Amoroso, Maritta; Kinnunen, Marjaana      | 2016 | Work-related stress management between workplace and occupational health care                                                                  | Work: Journal of Prevention, Assessment                | 54   | 3 | Exclusion reason: Wrong population |
| Strömberg, Marcus; Eriksson, Lena                   | 2016 | Social capital among healthcare professionals: A prospective study of its importance for job satisfaction                                      | International Journal of Nursing Studies               | 53   |   | Exclusion reason: Wrong comparator |
